# Supplementary material
Source: PubMed Central journal article supplement (PMC7075650)
Supplement: jm5b01461_si_001.pdf [file jm5b01461_si_001.pdf]

## Supporting Information

### An Overview of Severe Acute Respiratory Syndrome-Coronavirus (SARS-CoV) 3CL Protease Inhibitors: Peptidomimetics and Small Molecule Chemotherapy

Thanigaimalai Pillaiyar<sup>†,\*</sup>, Manoj Manickam,<sup>||</sup> Vigneshwaran Namasivayam<sup>†</sup>, Yoshio Hayashi<sup>§</sup> and Sang-Hun Jung<sup>||</sup>

<sup>†</sup>Pharmaceutical Institute, Pharmaceutical Chemistry I, University of Bonn, D-53121 Bonn, Germany

<sup>§</sup>Department of Medicinal Chemistry, Tokyo University of Pharmacy and Life Sciences, Tokyo 192-0392, Japan

<sup>||</sup>College of Pharmacy and Institute of Drug Research and Development, Chungnam National University, Daejeon 305-764, South Korea

#### Corresponding Author

E-mail: [thanigai@uni-bonn.de](mailto:thanigai@uni-bonn.de). Tel. int. (office) +49-228-73-2360,

#### Table of contents

**Figure S1.** The docked pose of compound **18** with 2GX4

**Figure S2.** The crystal structure of compounds **40-43** complexed with SARS 3CL<sup>pro</sup>

**Figure S3.** The crystal structure of compound **44** bound with SARS 3CL<sup>pro</sup>

**Figure S4.** The crystal structure complex of compound **45** and SARS 3CL<sup>pro</sup>

**Figure S5.** The docked pose of compound **78** into the binding pocket of SARS 3CL<sup>pro</sup>

**Figure S6.** The docked pose of compound **86** in the binding pocket of SARS 3CL<sup>pro</sup>

**Figure S7.** The docked pose of compound **105** in the binding pocket of SARS 3CL<sup>pro</sup>

**Figure S8.** The docked pose of compound **140** in the binding pocket of SARS 3CL<sup>pro</sup>

**Table 1.** Sequence comparison analysis of 3CL<sup>pro</sup> of Coronaviruses to the SARS-CoV 3CL<sup>pro</sup> Tor2 strain.

**Table 2.** A List of X-ray crystal structures of ligands with 3CL<sup>pro</sup>

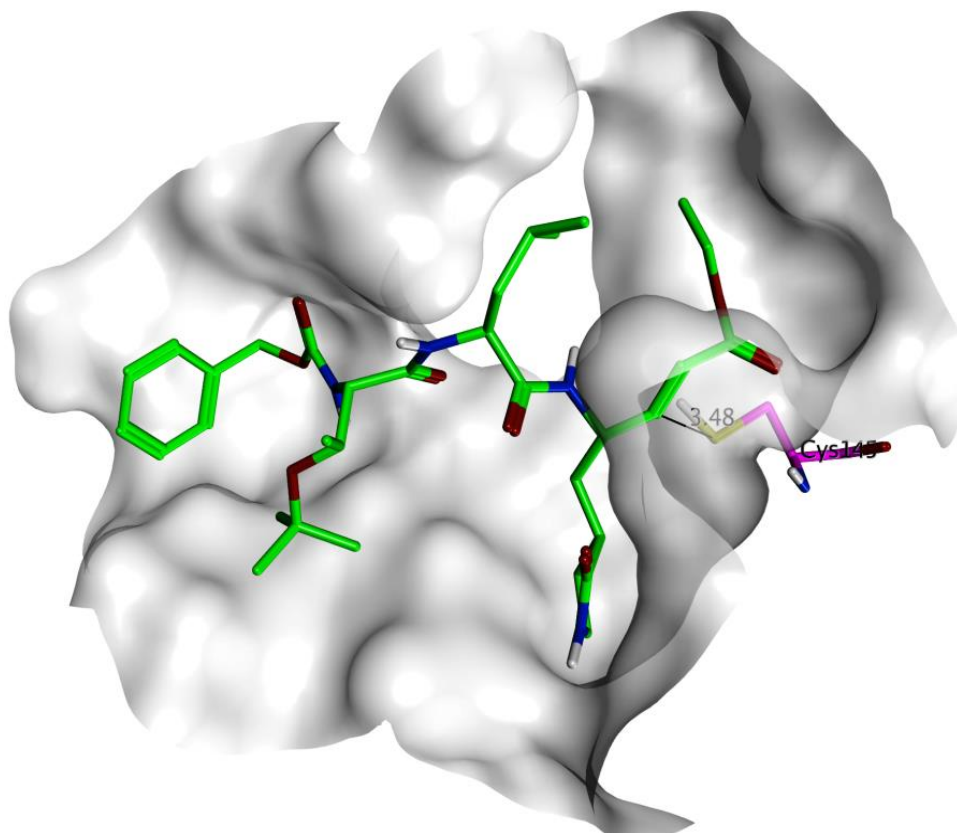

**Figure S1:** The docked pose of compound **18** (green) into the binding pocket of SARS 3CL<sup>pro</sup> (PDB ID: 2GX4).<sup>1</sup> The key interacting amino acid Cys145 is highlighted in magenta and binding pocket in grey.

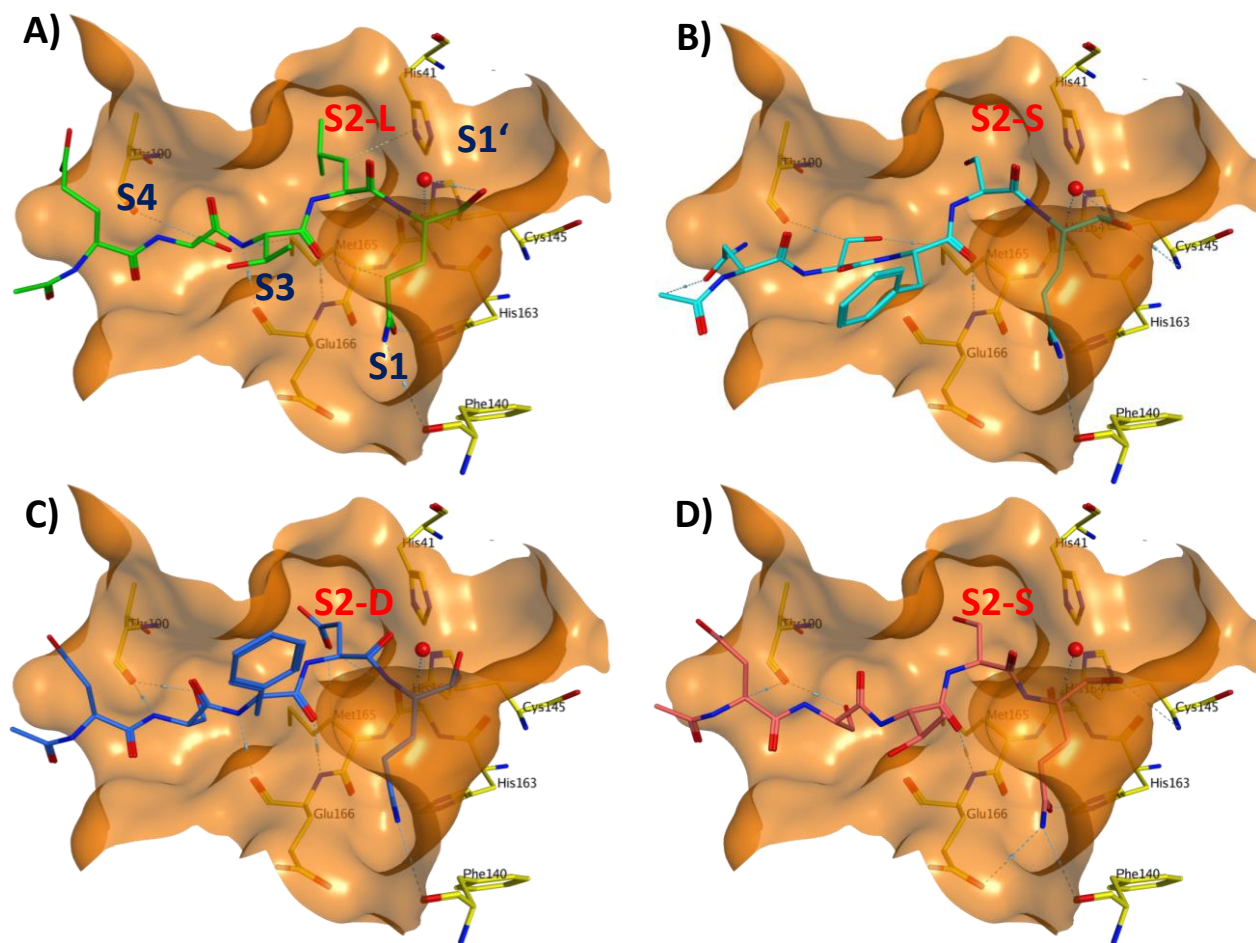

**Figure S2:** The crystal structure of compounds **40-43** complexed with SARS 3CL<sup>Pro</sup>. The compounds A) 41 (green, PDB ID:3SNE) B) 42 (cyan, PDB ID:3SNA) C) 43 (blue, PDB ID:3SNB) and D) 44 (brown, PDB ID:3SNC) shown in stick model and highlighted with their respective amino acids in the S2 pocket.<sup>2</sup>

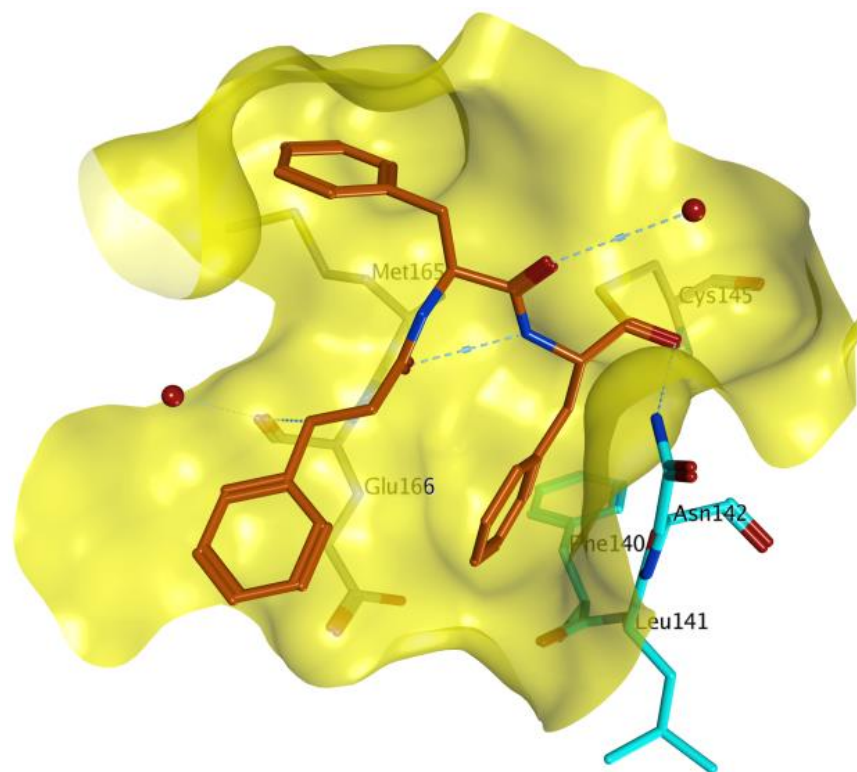

**Figure S3:** The crystal structure of compound **44**(brown) bound with SARS 3CL<sup>pro</sup>. The amino acids in the binding pocket (grey) with the important amino acids (cyan) are highlighted.<sup>2</sup>

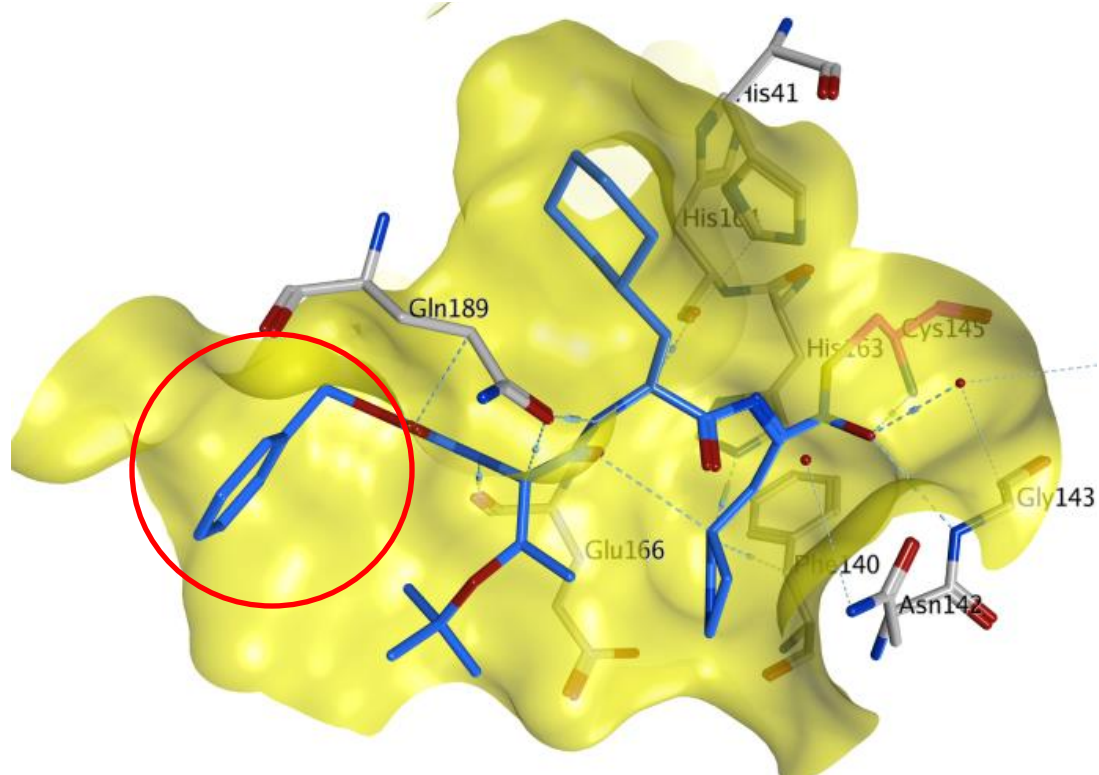

**Figure S4:** The crystal structure complex of compound **45**(blue) and SARS 3CL<sup>pro</sup>. The unique conformation of benzyloxy is shown in red circle, the amino acids in the binding pocket (grey) and covalent bonding of **45** with Cys145 (magenta) is highlighted.<sup>1</sup>

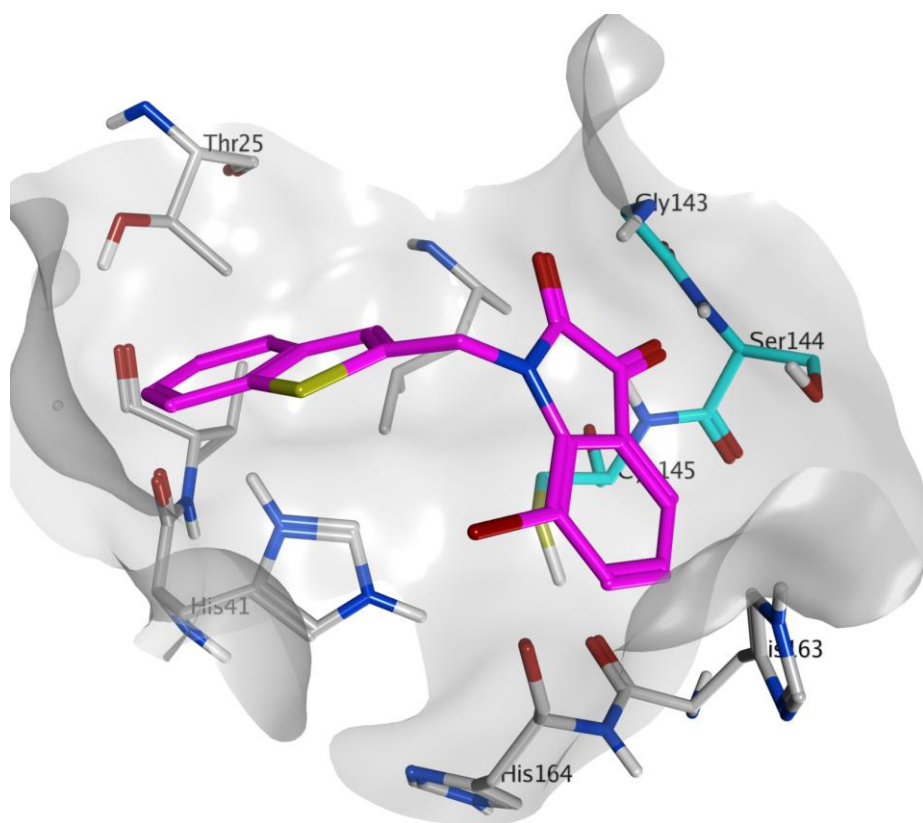

**Figure S5:** The docked pose of compound **78**(magenta) into the binding pocket of SARS 3CL<sup>pro</sup> (PDBID: 1UK4).<sup>3</sup>The key interacting amino acids (cyan) are highlighted with the amino acids in the binding pocket (grey).



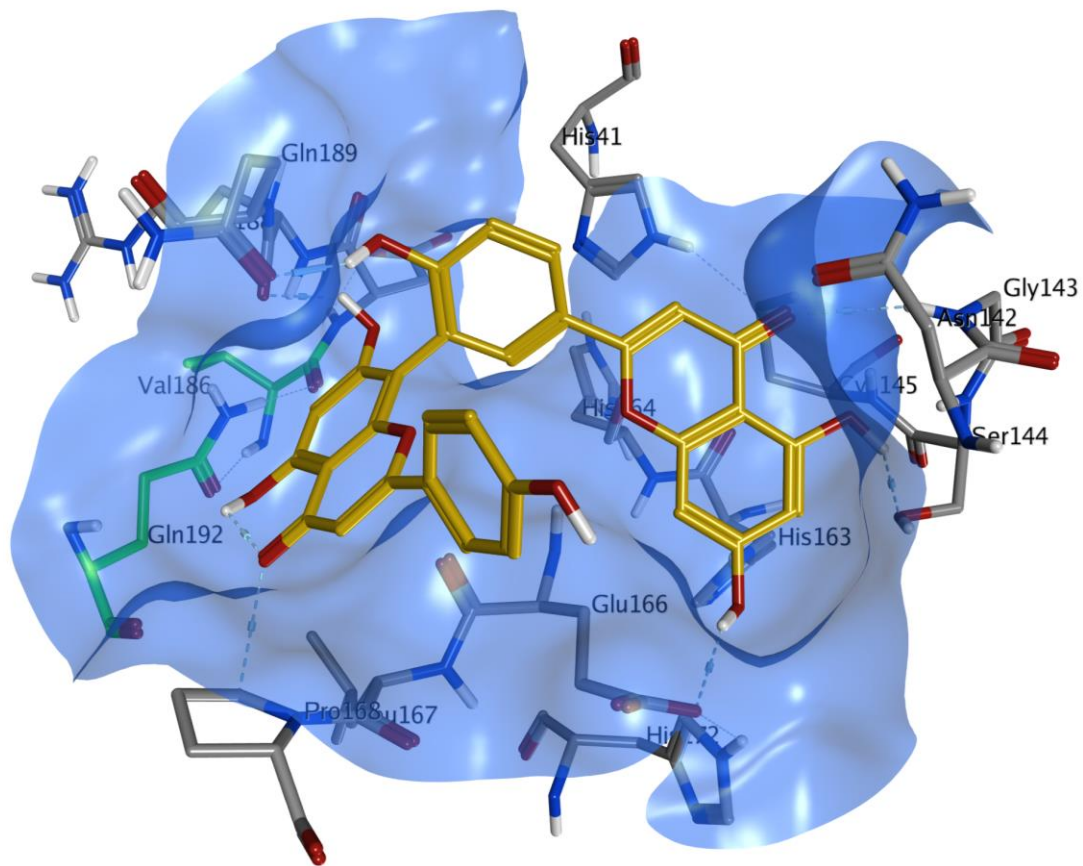

**Figure S6:** The docked pose of compound **86**(golden yellow) in the binding pocket of SARS 3CL<sup>pro</sup> (PDBID: 2Z3E).<sup>4</sup> The key interacting amino acids Gln192 and Val186 (green) are highlighted with the amino acids in the binding pocket (grey).

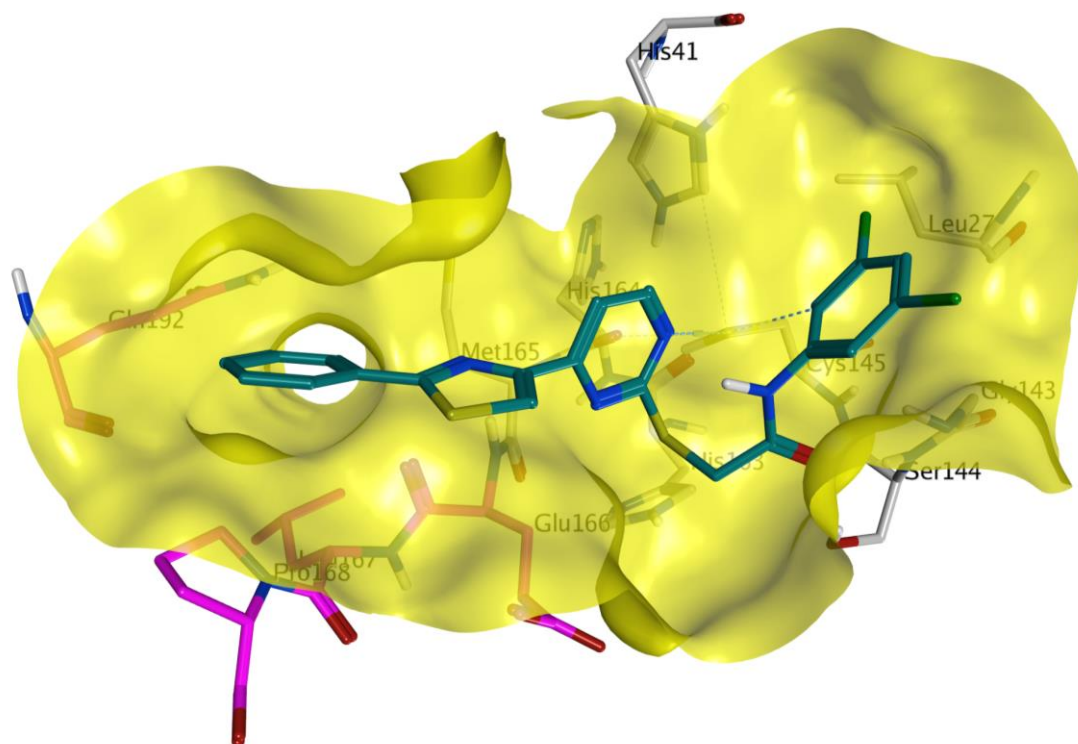

**Figure S7:** The docked pose of compound **105**(blue) in the binding pocket of SARS 3CL<sup>pro</sup> (PDBID: 1UK4).<sup>3</sup> The key interacting amino acids Glu166, Pro168, and Gln192 (magenta) are highlighted with the amino acids in the binding pocket (grey).



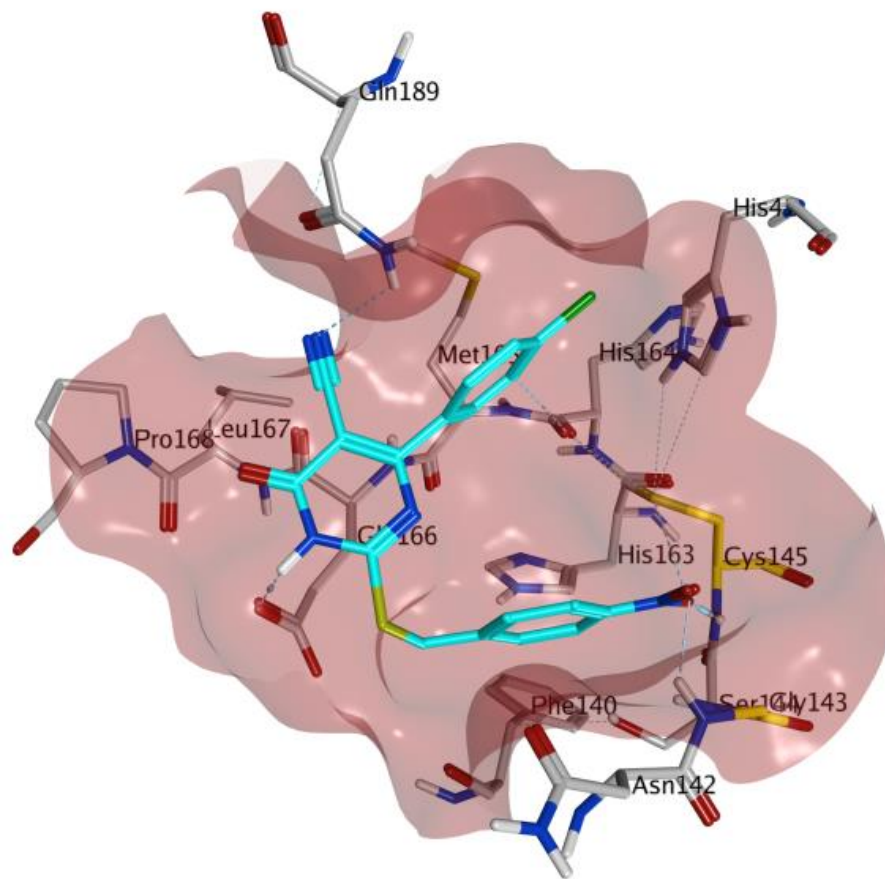

**Figure S8:** The docked pose of compound **140** (cyan) in the binding pocket of SARS 3CL<sup>pro</sup> (PDBID: 1UK4).<sup>3</sup>Nitro group formed a hydrogen bond with side chains of Gly-143 and Cys145, and the 4-chloro phenyl ring was predicted to fit into the S2 pocket.

**Table 1.** Sequence comparison analysis of 3CL<sup>pro</sup> of Coronaviruses to the SARS-CoV 3CL<sup>pro</sup> Tor2 strain.<sup>12</sup>

| <b>Coronaviruses</b> | <b>Sequence identity to SARS-3CL<sup>pro</sup> (%)</b> | <b>Sequence similarity to 3CL<sup>pro</sup> (%)</b> |
|----------------------|--------------------------------------------------------|-----------------------------------------------------|
| HCoV-HKU1            | 48                                                     | 62                                                  |
| HCoV NL63            | 43                                                     | 60                                                  |
| HCoV-OC43            | 49                                                     | 64                                                  |
| HCoV-229E            | 40                                                     | 65                                                  |
| SARS-Civet           | 100                                                    | 100                                                 |
| Bat-CoV              | 52                                                     | 70                                                  |
| TGEV                 | 44                                                     | 67                                                  |
| PEDV                 | 44                                                     | 69                                                  |
| MHV                  | 50                                                     | 73                                                  |
| BCV                  | 49                                                     | 71                                                  |
| Giraffe-CoV          | 48                                                     | 64                                                  |
| IBV                  | 44                                                     | 64                                                  |
| FIPV                 | 43                                                     | 60                                                  |

**Table 2.** A List of X-ray crystal structures of ligand with proteases

| <b>E.No</b> | <b>PDB ID</b> | <b>Protein Name</b>                                                 | <b>Ligand Name</b>                                | <b>Resolution (Å)</b> | <b>Reference</b> |
|-------------|---------------|---------------------------------------------------------------------|---------------------------------------------------|-----------------------|------------------|
| 1           | <b>1CQQ</b>   | Type 2 Rhinovirus 3C <sup>pro</sup>                                 | peptidomimetic <b>2</b> (or AG7088)               | 1,85                  | 5                |
| 2           | <b>1P9U</b>   | Transmissible gastroenteritis coronavirus (TGEV) 3CL <sup>pro</sup> | peptidomimetic <b>1</b> ( or CMK inhibitor )      | 2,37                  | 5                |
| 3           | <b>1UK2</b>   | SARS- Coronavirus 3CL <sup>pro</sup>                                | Small molecule, <b>178</b>                        | 2,20                  | 6                |
| 4           | <b>1UK4</b>   | SARS- Coronavirus 3CL <sup>pro</sup>                                | Small molecule, <b>178</b>                        | 2,50                  | 6                |
| 5           | <b>1Z1I</b>   | SARS- Coronavirus 3CL <sup>pro</sup>                                | Phenyl mercuric acetate, <b>168</b>               | 2,80                  | 7                |
| 6           | <b>2GX4</b>   | SARS- Coronavirus 3CL <sup>pro</sup>                                | peptidomimetic <b>45</b> (or TG- <b>0205221</b> ) | 1,93                  | 1                |
| 7           | <b>2Z3C</b>   | SARS- Coronavirus 3CL <sup>pro</sup>                                | Peptidomimetic, <b>19</b>                         | 1,79                  | 8                |
| 8           | <b>2Z3D</b>   | SARS- Coronavirus 3CL <sup>pro</sup>                                | Peptidomimetic, <b>19</b>                         | 2,10                  | 8                |
| 9           | <b>2Z3E</b>   | SARS- Coronavirus 3CL <sup>pro</sup>                                | Peptidomimetic, <b>19</b>                         | 2,32                  | 8                |
| 10          | <b>3SN8</b>   | SARS- Coronavirus 3CL <sup>pro</sup>                                | Peptidomimetic, <b>44</b>                         | 1,99                  | 2                |
| 11          | <b>3SNA</b>   | SARS- Coronavirus 3CL <sup>pro</sup>                                | Peptidomimetic, <b>41</b>                         | 3,05                  | 2                |
| 12          | <b>3SNB</b>   | SARS- Coronavirus 3CL <sup>pro</sup>                                | Peptidomimetic, <b>42</b>                         | 2,40                  | 2                |
| 13          | <b>3SNC</b>   | SARS- Coronavirus 3CL <sup>pro</sup>                                | Peptidomimetic, <b>43</b>                         | 2,58                  | 2                |
| 14          | <b>3SNE</b>   | SARS- Coronavirus 3CL <sup>pro</sup>                                | Peptidomimetic, <b>40</b>                         | 2,60                  | 2                |
| 15          | <b>3V3M</b>   | SARS- Coronavirus 3CL <sup>pro</sup>                                | Small molecule, <b>146</b>                        | 1,96                  | 9                |
| 16          | <b>4MDS</b>   | SARS- Coronavirus 3CL <sup>pro</sup>                                | Small molecule, <b>157</b>                        | 1,60                  | 10               |
| 17          | <b>4TWW</b>   | SARS- Coronavirus 3CL <sup>pro</sup>                                | Small molecule, <b>143</b>                        | 2,42                  | 11               |

**REFERENCES**

- (1) Yang, S.; Chen, S.- J.; Hsu, M.-F.; Wu, J.-D.; Tseng, C.-T. K.; Liu, Y.-F.; Chen, H.-C.; Kuo, C.-W.; Wu, C.-S.; Chang, L.-W.; Chen, W.-C.; Liao, S.-Y.; Chang, T.-Y.; Hung, H.-H.; Shr, H.-L.; Liu, C.-Y.; Huang, Y.-A.; Chang, L.-Y.; Hsu, J.-C.; Peters, C. J.; Wang, A. H. -J.; Hsu, M. -C. Synthesis, crystal structure, structure-activity relationships, and antiviral activity of a potent SARS coronavirus 3CL protease inhibitor. *J. Med. Chem.* **2006**, *49*, 4971-4980.
- (2) Zhu, L.; George, S.; Schmidt, M. F.; Al-Gharabli, S. I.; Rademann, J.; Hilgenfel. R. Peptide aldehyde inhibitors challenge the substrate specificity of the SARS-coronavirus main protease. *Antiviral Res.* **2011**, *92*, 204-212.
- (3) Yang, H.; Yang, M.; Ding, Y.; Liu, Y.; Lou, Z.; Zhou, Z.; Sun, L.; Mo, L.; Ye, S.; Pang, H.; Gao, G. F.; Anand, K.; Bartlam, M.; Hilgenfeld, R.; Rao, Z. The crystal structures of severe acute respiratory syndrome virus main protease and its complex with an inhibitor. *Proc. Natl. Acad. Sci. USA* **2003**, *100*, 13190-1315.
- (4) Ryu, Y. B.; Park, S.-J.; Kim, Y. M.; Lee, J. Y.; Seo, W. D.; Chang, J. S.; Park, K. H.; Rho, M.-C.; Lee, W. S. Biflavonoids from *Torreya nucifera* displaying SARS-CoV 3CLpro inhibition. *Bioorg. Med. Chem.* **2010**, *18*, 7940-7947
- (5) Anand, K.; Ziebuhr, J.; Wadhwani, P.; Mesters, J. R.; Hilgenfeld, R. Coronavirus main proteinase (3CLpro) structure: Basis for design of anti-SARS drugs. *Science* **2003**, *300*, 1763-1767.
- (6) Kao, R.Y.; Tsui, W. H. W.; Lee, T. S. W.; Tanner, J. A.; Watt, R. M.; Hung, J. D.; Hu, L. H.; Chen, G. H.; Chen, Z. W.; Zhang, L. Q.; He, T.; Chan, K. H.; Tse, H.; To, A. P. C.; Ng, L. W. Y.; Wong, B. C. W.; Tsoi, H. W.; Yang, D.; Ho, D. D.; Yuen, K. Y. Identification of novel small-molecule inhibitors of severe acute respiratory syndrome-associated coronavirus by chemical genetics. *Chem. Biol.* **2004**, *11*, 1293-1299.
- (7) Lee, C.-C.; Kuo, C.-J.; Hsu, M.-F.; Liang, P.-H.; Fang, J.-M.; Shie, J.-J.; Wang, A. H.-J. Structural basis of mercury-and zinc-conjugated complexes as SARS-CoV 3C-like protease inhibitors. *FEBS Lett.* **2007**, *581*, 5454-5458
- (8) Yin, J.; Niu, C.; Cherney, M. M.; Zhang, J.; Huitema, C.; Eltis, L. D.; Vederas, J. C.; James, M.N.G. A mechanistic view of enzyme inhibition and peptide hydrolysis in the active site of the SARS-CoV 3C-like peptidase. *J. Mol. Biol.* **2007**, *371*, 1060-1074.

- (9) Jacobs, J.; Grum-Tokars, V.; Zhou, Y.; Turlington, M.; Saldanha, S.A.; Chase, P.; Egger, A.; Dawson, E.S.; Baez-Santos, Y.M.; Tomar, S.; Mielech, A.M.; Baker, S.C.; Lindsley, C.W.; Hodder, P.; Mesecar, A.; Stauffer, S.R. Discovery, synthesis, and structure-based optimization of a series of N-(tert-butyl)-2-(N-arylamido)-2-(pyridin-3-yl) acetamides (ML188) as potent noncovalent small molecule inhibitors of the severe acute respiratory syndrome coronavirus (SARS-CoV) 3CL protease. *J. Med. Chem.* **2013**, *56*, 534-546.
- (10) Turlington, M.; Chun, A.; Tomar, S.; Egger, A.; Grum-Tokars, V.; Jacobs, J.; Daniels, J.S.; Dawson, E.; Saldanha, A.; Chase, P.; Baez-Santos, Y.M.; Lindsley, C.W.; Hodder, P.; Mesecar, A.D.; Stauffer, S.R. Discovery of N-(benzo[1,2,3]triazol-1-yl)-N-(benzyl)acetamido)phenyl) carboxamides as severe acute respiratory syndrome coronavirus (SARS-CoV) 3CLpro inhibitors: identification of ML300 and noncovalent nanomolar inhibitors with an induced-fit binding. *Bioorg. Med. Chem. Lett.* **2013**, *23*, 6172-6177.
- (11) Shimamoto, Y.; Hattori, Y.; Kobayashi, K.; Teruya, K.; Sanjoh, A.; Nakagawa, A.; Yamashita, K.; Akaji, K. Fused-ring structure of decahydroisoquinolin as a novel scaffold for SARS 3CL protease inhibitors. *Bioorg. Med. Chem.* **2015**, *23*, 876-890.
- (12) Barrila, J. A. Dimerization of the SARS coronavirus 3CL protease is controlled through long-range interactions. The Johns Hopkins University, ProQuest, UMI Dissertations Publishing, **2009**, 3339678.
